# Supplementary material for: 1-Aminocyclopropane-1-carboxylic acid (ACC) concentration and ACC synthase expression in soybean roots, root tips, and soybean cyst nematode (Heterodera glycines)-infected roots
Source: PubMed Central journal article supplement — J Exp Bot. 2009 Oct 27;61(2):463–72. doi: 10.1093/jxb/erp317 (PMC2803212; doi:10.1093/jxb/erp317), 2009-10-27
Supplement: erp317_1.pdf [file erp317_1.pdf]

**TITLE:** 1-Aminocyclopropane-1-carboxylic acid (ACC) concentration and ACC synthase expression in soybean roots, root tips and soybean cyst nematode (*Heterodera glycines*) colonized roots.

**AUTHORS:** Mark L. Tucker<sup>1,2</sup>, Xue Ping<sup>1</sup>, and Ronghui Yang<sup>1</sup>

**Table S1 (supplement).** FASTA file of sequences used for primer design and protein translations. Sequences include the open reading frames plus 50 nt of 3' untranslated regions.

```
>GmACS2a (originally GmACS1i) ORF plus 50 nt
ATGCAGAACCAACAGCTTCTGTCCAAGATTGCCAACAAATGACAAACATGGAGAGAATTCTCCATATTTTTGATGGGTT
GAAGGCATATGATAGAAACCCATTTCCACCCTAAAAAAAATCCTCAAGGTGTTATCCAGATGGGTCTTGCTGAAAATC
AGCTCTGCTTTGATCTGATTGAAGAGTGGATAAGAAATAATCCCAAGACTTCCATTTGCACTCCTGAAGGAGTGCAT
CAGTTCAGAAATATTGCTAACTTTCAGGACTATCATGGGTGCGAGAGTTCACAAATGCAATGGCAAATTTTATGTC
AAAAGTGAGAGGAGGTAGGGTCAAATTTGATGCAGACCGTATATTGATGAGTGGAGGGGCAACAGGGGCAAATGAAC
TAATCATGTTCTGCTTGGCTGATCCTGGAGATGCTTTTATGATTCCTACCCCATTTTATCCAGGATTCGTCCGTGAC
TTGTGTTGGAGAACTGGGGTGCATTAATCCCTGTCCACTGTGATAGCTCCAACAACCTCAAGATAACAAGAGAAGC
TCTTGAAGTAGCTTACAAAAAGCCAAAGAAGACAACATCAACGTGAAGGGGTTGATCATAACAAACCCCTTCTAACC
CTTTGGGCACAACATTAGACAAGGACACGTTGAAGAGCCTAGTGAGCTTCATCAACGAGAAAAACATTCACTTGTT
TGTGATGAAATCTATGCTGCCACTGTTTTTCAGCTCCCCTAGTTATGTGAGCGTTGCTGAAGTGATTCAAGAAATGAA
ACATTGCAAACGTGACCTAATTCATGTGATTTATAGTTTGTCTAAGGATATGGGGTACCCGGCTTCAGAGTTGGCA
TAGTTTATTCATTCAACGATGAAGTGGTGAATTGTGGAAGGAAAATGTCGAGTTTCGGATTAGTCTCTACGCAAAC
CAACACATGTTGGCATCAATGCTCTCGGATGAAAAGTTTGTAACTAGGTTTCTTTCCGAGAATTTCGAGGAGGTTGGA
ACAAAGGCATGACAAGTTCATGAAGGGCTTGAAGAGGTTAACATTACTCGATTCCCAAGCAATGCTGGACTTTTCT
GCTGGATGAACCTGAAGTGTGTTGGAGGAACCAACGTTTGAAGCTGAGTTGAAGCTATGGCGTGTGATTATTCAT
GAGGTGAAGCTCAATGTTTACCAGGCTCTTCCCTCAATTGTTCTGAGCCTGGTTGGTTTAGGGTTTGCTTTGCCAA
CATGGATGATGAAACTGTGGATGTTGCACTCAACAGGATTCGTGCATTCGTGGGTAAAGAACTAAGAAACCTGTGG
GATTCAAACGTTGGCAACCGAATCTTAGGCTCAGTTTTTCTTCAAGGATGTTTGAGGAGAGTGTATGTCTCCTCAT
TCACCTATTCTACGTACCACTTATTGGAGCTACTTGAtttaattgaatcagggttctgcacgagcgtttatatcctt
tcaagaataata
>GmACS2b (originally GmACS1k) ORF plus 50 nt
ATGGTGAGCCAACAGCTTCTGTCCAAGATTGCCACCAATGACAAACATGGAGAGAATTCTCCATATTTTTGATGGGTG
GAAGGCATATGATAGAAACCCCTTTCCACCCTACAAAAAATCCTCAGGGTGTATTCCAGATGGGTCTTGCTGAAAACC
AGCTTTGCTTTGATTTGATTGAAGAGTGGATAAGGAATAACCCAGGGCTTCCATTTGCACTCCTGAAGGAGTGCAT
CAGTTCAGAAATATTGCTAAATTTTCAGGACTATCATGGGTGCGAGAGTTCACAAATGAAATGGCAAATTTTATGTC
AAAAGTGAGAGGAGGTAGGGTCAAATTTGATCCAGACCGTATATTGATGAGTGGAGGGGCAACAGGGGCAAATGAAC
TAATCATGTTCTGCTTGGCTGATCCTGGAGATGCTTTTATGATTCACCCCATTTTATCCCGGATTCGTCCGTGAC
TTGTGTTGGAGAACTGGGGTGCATAAATTCCTGTCCACTGTGATAGCTCCAACAACCTCAAGATAACAAGAGAAGC
ACTTGAAGTAGCCTACAAAAAGCCAAAGAGGACAACATCAACGTGAAGGGGTTGATCATAACAAACCCGCTAACC
CTTTAGGCACAACATTAGACAAGGACACGTTGAAGAGCCTAGTGAATTTTCATCAACGAAAAAACATTCACTTAGTT
TGTGATGAAATCTATGCTGCCACTGTTTTTCAGCTCCCCTAGTTATGTAAGCGTTGCCGAAGTGATCCAAGAAATGGA
ACATTGCAAACGTGACCTAATTCATGTGATTTATAGTTTGTCTAAGGACATGGGGTTTCTGGCTTCAGGGTTGGCA
TAGTTTACTCATTCAACGATGAAGTGGTGAATTGTGGAAGGAAAATGTCGAGTTTCGGATTAGTCTCTACGCAAAC
CAACACATGTTGGCTTCGATGTTTTCCGGATGAAAAGTTTGTAACTAGGTTTCTTTCCGAGAATTCTAGGAGGTTGGA
ACAAAGGCACGAAAAGTTCATGAAGGGGCTTGAAGAGGTTAACATCACTCGATTCCCAAGCAATGCGGGACTTTTTT
GTTGGATGAACCTGAAGAGTTTGTGGAGGAGCCATCTTTTGAAGCTGAGTTGAAGCTATGGCGTGTGATTATTCAT
GAGGTGAAGCTCAATGTTTACCAGGATCTTCCCTCAACTGTTCTGAGCCTGGTTGGTTTAGGGTTTGCTTTGCCAA
CATGGATGATGAAACAGTGGATGTTGCACTCAACAGAATTCGTGCATTCGTAGGTAAAGAACTAAGAAATCGGTGG
GATTCAAACGATGGCAACCGAATCTTAGGCTCAGTTTTCTTCAAGGATATTTGATGAGAGTGTATGTCTCCTCAT
TCGCTATTCTACTTCAACCTTGTGGAGCCAATTGAttg gatctgggttctactcgagcgtttatatTTTTTcaa
gaataatgatgt
>GmACS2c (originally GmACS1j) ORF plus 50 nt
ATGGCTTTGGGGAACAACAGTCACCAGCTTCTGTCAAAAAATTGCAACCAATGACAAGCATGGAGAAAATTCTCCTTA
CTTTGATGGTTGGAAGGCCTATGATTCAAACCCATTTCACCCCACAAAAAATCCTCAGGGTGTATCCAGATGGGTC
TTGCAGAAAATCAGCTCTGCTTTGATCTGATTCAAGAGTGGATAAGGAACAATCCCAAGGCCTCCATTTGCACTGCT
GAAGGAGTGAACCAGTTCAAATATATTGCAAACCTTTCAAGACTATCATGGATTGCCAGAGTTCAGAAATGCTGTGGC
AAATTTTATGTCAAAAGTGAGAGGTGGGAGAGTGAATTTGATCCTGACCGTATTTTATGATGAGTGGGGGGGCCACTG
```

GAGCAAATGAGCTAATAATGTTCTGTTTGGCTGATCCTGGAGATGCTTTTTCTGGTTCTAGCCCTTATTATCCAGCA  
TTTGTCCGAGACTTGTGTTGGAGAACAAGGACGCAACTAATTCCTCGTAGAGTGTACAGCTCCAACAATTTAAGAT  
AACAAGAGAGGCTCTTGAAGAAGCATATGAAAAAGCAAAAGAGGGTAACATCAACGTGAAAGGGTTGATCATAACAA  
ACCCTTCAAACCCTTTGGGAACCACCCTTGACAGGGAAACACTGAAGAGCATAAGTGGGGTTCATCAATGAAAAAGAAC  
ATCCATTTGGTGTGTGATGAAATCTATGCAGCAACAGTGTTCAGAGCCCCTAGCTTTGTGAGTGTCTCTGAGGTGAT  
GCAAGACATTGAGCATTGCAAAAAAGACCTCATTACATTATTTATAGTTTGTCTAAGGATTTGGGACTTCCAGGGT  
TCAGAGTTGGAATAGTTTATTACATACAATGATGAAGTGGTGAACAGTGGTAGGAAAATGTCAAGCTTTGGATTGGTC  
TCATCTCAGACACAGTATTTTCTTGCTGCATTGCTTTCCGACGACGAGTTCGTGGAGAGGTTTCTGGCAGAGAGTGC  
AAGAAGGTTGGCTGCAAGGCATAGCCACTTCACAAAAGGGCTTGAAAAGGTGAACATTACTTGCCTGCCAAGTAATG  
CAGGGCTTTTCTTTTGGATGAACTTGAGGGGTTTGTCTAAGGAGAAAACATTTGAGGGTGAATGATGCTGTGGCGT  
GTGATCATCAATGAGGTGAAGCTCAATGTGTACCTGGGTGAGCTTTCAATTGTTCTGAGCCTGGTTGGTATAGGGT  
GTGCTTTGCAAACATGGATGATGAACTGTGGATGTTGCACTCATGAGAATCAGGGCTTTTGTGGCAAGGAGACAG  
GGAAGCCACCAAAGGAAGTCAAACGTTGGAAAAGTAACCTTAGACTCAGCTTCTCCAACCTCTAGAAGATTTGATGAG  
AATGTTATGTCACCTCATTACCAATGCCTCACTCACCTCTTGTGAGAGCCACTTAGttggaccagcaagcatacct  
tcattaccttgagagattcatatgtattaa

>GmACS2d (originally GmACS11) ORF plus 50 nt

ATGGCTTTGGGGAACAACAGTCACCAGCTTCTGTGCAAAAATTGCAACCAACGACAAGCATGGAGAAAATTCCCCATA  
CTTTGATGGATGGAAGGCCTATGATTCAAACCCATTCCACCCCAAAAAATCCTCAGGGTGTCCATCCAGATGGGTC  
TTGCAGAAAATCAGCTGTGCTTTGATATGATTCAAGAGTGGATAAGGAACAATCCTAAGGCCTCCATTTGCACTGCT  
GAAGGAGTGAACCAGTTCAAATATATTGCAAACCTTTCAAGACTATCATGGATTGCCAGAGTTCAGAAAATGCTGTGGC  
AAATTTTCATGTCAAAGTGAAGAGTGGGAGAGTGAAGATTTGATCCTGACCGTATATTGATGAGTGGAGGGGCCACAG  
GAGCAAACGAGCTAATAATGTTCTGTTTGGCTGATGCTGGAGATGCTTTTTCTGGTTCTAGCCCTTATTATCCAGCA  
TTTGTCCGCGACTTGTGTTGGAGAACAAGGGCACAACCTAATTCCTGTGGAGTGTACAGCTCCAACAACCTTCAAGAT  
AACAAGAGAGGCTCTTGAAGAATCATATAGGAAAGCAAAAGAGGGTAACATCAACGTAAAAGGGTTGATCATAACAA  
ACCCTTCAAACCCTTTAGGAACCACCATAGACAAGGAAACACTTAAGAGCATTGTGGGGTTCATCAATGAAAAAGAAC  
ATCCATTTGGTGTGTGATGAAATCTATGCAGCAACGGTGTTCAGAGCCCCTAGCTTTGTGAGTGTCTCTGAAGTAAT  
GCAAGACATGGAGCATTGCAAAAAAGACTTAATTCACATTATTTATAGTTTGTCTAAGGACTTGGGGCTTCCAGGGT  
TCAGAGTTGGCATAGTTTATTACATACAATGATGAAGTGGTGAACAGTGGGAGGAAAATGTCTAGCTTTGGATTGGTA  
TCATCTCAGACACAGCATTTTCTTGCTGCATTGCTTTCCGACGACGAGTTCGTGGAGAGGTTTTTGGCAGAGAGTGC  
AAGAAGGTTGGCTGCAAGGCACAGCCACTTCACAAAAGGGCTTGAAAAGGTGAACATTACTTGCCTGCCAAGTAATG  
CAGGGCTTTTCTTTTGGATGAACTTGAAGGGTTTGTGTAAGGAGAAAACGTTTGAAGGGTGAATGATGCTGTGGCGT  
GTGATCATCAATGAGGTGAAGCTCAATGTGTACCCAGGGTGCAGCTTTCAATTGCTCTGAGCCTGGTTGGTATAGGGT  
GTGCTTTGCAAACATGGATGATGAACTGTGGATGTTGCACTCATGAGAATCAGGGCTTTTGTGGCAAGGAGACAG  
GGAAGCCACCAAAGGAAGTCAAACGTTGGAAAAGTAACCTTAGACTCAGCTTCTCCAACCTCTAGAAGATTTGATGAG  
AATCTTATGTCACCTCACATGATGTCACCCCATTCACCAATGCCTCACTCACCCCTTGTGAGAGCCACTTAAAttgga  
ccagcaagcataccttcattaccttgaaagattcatatgtattaa

>GmACS6a (originally GmACS1d) ORF plus 50 nt

ATGGGGTTGATGGCTGCGAACCAAACTCAATTGTTGTCTAAGATGGCCATCGGAGATGGACATGGTGAAGCATCCCC  
ATATTTTGTATGGATGGAAGGCTTATGATGAAAACCCCTTTCATCCCAAAGAGAATCCTAACGGGGTTATTCAAATGG  
GTCTTGTGAGAATCAGCTTACTTCTGATTTGGTTGAAGATTGGATACTGAATAACCCAGAGGCCTCCATTTGCACT  
CCAGAAGGAATAAATGATTTTCAAGGCAATAGCTAACTTTCAGGATTATCATGGTCTACCCGAGTTCAGAAAATGCTGT  
GGCTAAATTCATGGGTAGAACAAGAGGAAACAGAGTACGTTTGTATCCTGATCGTATGTGATGAGCGGTGGAGCAA  
CTGGAGCACACGAAGTCACTACCTTTTGTGGCAGACCCCGGTGACGCATTTTTGGTGGCAATTCCTTATTATCCA  
GGTTTTGACCGGGATTTGAGGTGGAGAACAGGAATTAACCTTGTCCAGTTATGTGCGATAGCTCAAACAATTTCAA  
GTTGACAAAGCAAGCATTGGAAGATGCGTATGAGAAAGCCAAAGAGGATAACATTAGAGTAAAGGGCATGCTCATCA  
CCAATCCTTCAAACCCATTAGGCACAGTCATGGACAGAAACACACTAAGAACCGTGGTGGAGCTTCATCAATGAGAAG  
CGTATCCATCTTGTATCTGATGAAATATACTCTGCAACAGTTTTTTAGCCGTCCCAGTTTCATAAGCATTGCTGAGAT  
ACTAGAGGAAGACACAGACATCGAATGTGACCGCAACCTCGTTCACATTGTTTATAGTCTTTCAAAGGATATGGGGT  
TCCCTGGCTTCAGAGTTGGCATCATATACTCTTACAATGATGCTGTGGTCAATTGTGCACGCAAAATGTCAAGCTTT  
GGGTGGTGTCAACACAGACTCAGCATCTTTTAGCATCAATGCTAAATGATGATGAGTTTGTGGAAAGGTTTCTGGA  
AGAGAGTGCAAAAGGTTGGCACAAGGCATAGAGTTTCACTTCGGGGTTGGCCAAAGTTGGCATAAAGTGTCTGCA  
AAAGCAATGCTGGTCTCTTTGTGTGGATGGATTTAAGGCAACTTCTCAAGAAGCCAACGCTTGACTCTGAAATGGAG  
CTTTGGAGAGTGCATTCATGAGGTTAAGATCAATGTTTACCTGGCTCTTCTTTCCATTGCACTGAGCCAGGGTG  
GTTTAGGGTGTGCTATGCCAACATGGATGATATGGCTGTGCAAATGCATTGCAAAAGAAATTCGAACCTTCGTGCTTC  
AAAACAAGGAGGTGATGTTTCTAACAAGAAGCAATGCTGGCACAGTAACTTGAAGTTGAGCCTCAAACCCAGAAGG  
TTTGTATGATATCATGATGTCACCTCACTCCCCTATACCTCAGTCCCCTTTGGTTAAAGCCACAATTTGAGttgcat  
atttctctgcaccatctcagaagaagtaactgatatacagatg

>GmACS6b (originally GmACS1a) ORF plus 50 nt

ATGGGGTTGATGGATGTGGACCAAACCTCAATTGTTGTCTAAGATGGTCATCGGAGATGGACATGGTGAAGCATCACC  
ATACTTTGATGGATGGAAGGCTTATGATGAAAACCCCTTTCATCCCAAAGAGAATCCTAACGGGGTTATCCAAATGG  
GTCTTGCTGAGAATCAGCTTACTTCTGATTTGGTTGAAGATTGGATACTGAATAACCCAGAGGCCTCCATTTGCACA  
CCAGAAGGAATAAATGATTTTCAGGGCCATAGCTAACTTTTCAGGATTATCATGGTCTGCCCGAGTTCAGAAATGCTGT  
GGCTAAATTCATGGGTAGAACAAGAGGAAACAGAGTCACGTTTGTATCCTGACCGTATTGTCATGAGCGGTGGAGCAA  
CTGGAGCACACGAAGTCACTACCTTTTGTGGCAGACCCTGGTGACGCATTTTTGGTGCCCATTCCTTATTATCCA  
GGTTTTGACCGGGATTTGAGGTGGAGAACAGGAATTAACCTGTTCCAGTTATGTGCGATAGCTCAAACAATTTCAA  
GTTGACAAAGCAAGCATTGGAAGATGCGTATGAGAAGGCCAAAGAGGATAATATAAGAGTAAAGGGCTTGCTCATCA  
CCAATCCATCAAACCCATTAGGCACAGTCATGGACAGAAACACACTAAGAACCGTGATGAGCTTCATCAACGAGAAG  
CGTATCCACCTTGTATCTGATGAAATATACTCTGCAACAGTTTTTAGCCACCCCAGTTTCATAAGCATTGCTGAGAT  
ATTAGAGGAAGACACAGACATCGAATGTGACCGCAACCTCGTTCACATTGTTTATAGTCTTTCAAAGGATATGGGGT  
TCCCTGGCTTCAGAGTTGGCATCATATACTCTTACAATGATGCTGTGGTCCATTGTGCACGCAAATGTCAAGCTTT  
GGATTGGTGTCAACACAGACTCAGTATCTTTTAGCATCAATGCTAAATGATGATGAGTTTGTGGAAAGTTTTCTGGT  
AGAGAGTGCAAAAAGGCTGGCACAAGGCATAGAGTTTTCTACTGGGGGGTTGGCCAAAGTTGGCATAAAGTCTTGC  
AAAGCAATGCTGGTCTCTTTGTGTGGATGGATTTAAGGCAACTTCTCAAGAAGCCAACGCTTGACTCTGAAATGGAG  
CTTTGGAGAGTGATCATTGATGAGGTTAAGATCAATGTTTCACCTGGCTCCTCTTTCCATTGCACTGAGCCAGGGTG  
GTTTAGGGTGTGCTATGCCAACATGGATGATATGGCTGTGCAAATTGCATTGCAAAGAATTCGTAACCTTTGTGCTTC  
AAAACAAGGAGATCATGGTGCCTAACAAGAAACATTGTTGGCACAGTAACTTGAGGTTGAGCCTCAAACCAGAAGG  
TTTGATGATATCATGATGTCACCTCACTCCCCATACTCAGTCACCTCTGGTTAAAGCCACAATTTGAgttggcat  
atttctctgaaccctctagaagaagtaactgatatatgatga

>GmACS6c (originally GmACS1e) ORF plus 50 nt

ATGAGTGTGAACGAACCCCAATTACTGTCTAAGATTGCCACTGGCGATGGACATGGTGAGAACTCCCCATACTTTGA  
TGGGTGGAAGGCTTATGAAGATGATCCCTTTTCATCCATAAAAAATCCTAATGGGGTAATCCAGATGGGTCTTGCAG  
AAAATCAGCTTGCTTCTGACTTGGTTCAAATTTGGTTAACGAACAAGCCTAGGGCATCCATTTGCACTCCTGAAGGA  
GTGCGTGATTTCAAGGCCATAGCTAATTTTCAGGACTACCATGGTCTGCCGAAATTCAGAAAAGCTGTGGCTAAAT  
CATGGCAAGAACGAGAGGAAATAGAGTCACATTCGACCCCTGACCGTATTGTTATGAGCGGTGGAGCAACTGGAGCAC  
ATGAGGTCACCTGCTTTTGTGGCAGACCCCGGCGAGGCATTTTTGGTCCCCACTCCTTATTATGCTGGATTTCGAC  
AGGGATTTGAGGTGGAGAACGGGCGTTGAACTTGTTCCTGTTAAATGTGAAAGCTCAAATGATTTCAAGTTAAACAAG  
GAAAGCGTTGCAAGAGGCGTACGAGAAAAGGCAAAGAGAAACAACATAAGAATAAAGGGCTTGCTAATTACCAACCCAT  
CAAACCCGTTGGGAACCATCATGGACCGAGAACTCTAAGAACAGTGGTGAGTTTCATCAATGAAAAACATATCCAC  
CTAGTAAGCGACGAAATATACGCTGGTACAGTTTTTTTGCACCCAGGTTTCACGAGCATCGCGGAGGTAATAGAGGA  
AGACACAGACATCGAATGTGACCGCGACCTTATCCACATTGTTTATAGTCTTTCAAAGGACATGGGGTTCCCTGGGT  
TCAGAGTTGGCATCATATACTCTTACAACGACGCAGTGGTGAATTGCGCTCGCAAAATGTCTAGCTTTGGATTAGTG  
TCCACACAGACCCAATACCTTTTAGCATCAATGCTTTCTGATGATGAGTTTGTGGAACGGTTCCTTGAAGAGAGTGC  
AAAAAGGCTTGCAAAAGGTATGGGGTTTTCTGTAGGGGACTTGCACAAGTTGGCATAAAGTGTCTGGCGAGCAACG  
CTGGTCTGTTTCTGTGGATGGACTTGCCTCGTCTTTTTGAAGAAGCCAACCTTTGAGGCCGAAATGGAAGTGTGAAA  
GTGATCATTGAGCAAGTGAAGATCAACATCTCCCCTGGCTCTTCCTTTCATTGTTCTGAGCCAGGGTGGTTCAGGGT  
GTGCTATGCTAACATGGATGATAGAACCCTGGAAGTTTCTCTGGCGAGAATGCGCACCTTCGTGAATCAGAACACCG  
AAGCCAAGAAATCTTGAGCCAGAGAACTTGAGGCTGAGCTTCTCGTTCAGAAAAGATGGATGAGTACTTGGTGTCA  
CCTCACTCCCCTTTTCTCAATCACCTCTTGTAAAGCCTCCACTTGATgattcaagggatttctgcccactccttgag  
tcctctaacacataactgcttg

>GmACS7a (originally GmACS1b) ORF plus 50 nt

ATGGGTATCAAGATTGAGCAAGAGCAACCTAGTGTGGAGCTTTCAAGAATTGCAGTTTCAGAACTCATGGAGAACA  
CTCCCCCTATTTTGTGGGTGGAAAGCCTATGATGAGAACCCTTATGATGAATTAACAACTCCTCCGGAGTTATAC  
AAATGGGATTGGCAGAAAATCAAGTTTCATTTGATTTGCTGGAAAATACTTTGGAGGAACACTCAGAGGCCTCAACA  
TGGGGAAAAGGAGCTCCTGGTTTCAGAGAGAACGCTTTGTCCAAGACTATCATGGACTTAAATCATTGAGAACAGC  
AATGGCAAGCTTCATGGAACAAATAAGAGGAGGGAGAGCGAAATTTGACCCAGATAGAGTGGTACTCACTGCAGGCG  
CAACTGCAGCCAATGAACTCTTAACCTTCACTTCTGTAACCCAGGAGATGCTCTACTTGTCCAACCCCTTACTAT  
CCAGGATTTGATAGAGATTTAAGGTGGAGAACTGGGGTGAACATAGTTCCAATCCATTGTGACAGCTCCAACAACCT  
CCAAATCACTCCTCAAGCTTTGGAGGCTGCATACAAAGAAGCAGAAGCAAAGAACACAAAAGTGAGAGGAGTGTGA  
TCACAAACCCATCAAACCCCTTAGGTGCAACAATTCAACGCACGGTCTGGAGGAGCTTCTGACTTCGTGACTCGC  
AAGAACATCCAACCTGTCTCAGATGAAATCTACTCAGGCTCGGTGTTTTCTCCTCCTCCGAGTTCGTGAGTGTAGCAGA  
AATCCTCGAAGCTCGCCAATAACAAGAACGCAGAAAGGGTTCACATTGTTTATAGCCTTCCAAGACCTTGGTCTTC  
CTGGTTTCAGAGTTGGAACATTTATTCATACAATGATAAGGTTGTGACCACAGCGAGAAGGATGTGAGATTTCACC  
TAAATATCCTCACAGACACAGCACCTTTTGGCTTCTATGTTGTCTGATAAAGAAGTCACTGAAAACCTACATTGAGAC  
CAACAGACAGAGGTTGAAGAAGAGGTACCAATGATTAATTGAAGGGTTGGAAGTGTGGCATAGAGTGTGAAAG  
GGAATGCAGGGTTGTTTTGCTGGATGAATCTGAGTCCACTGTTGGAGAAGCAAACCTAGGGAAGGAGAATTTGAGCTT  
TGGAATGTATTTGCATGAAGTGAACCTCAACATCTCTCCAGGGTCTTCTTGCCATTGTTCTGAACCCGGTTGGTT

CAGGGTGTGCTTTGCAAATATGAGTGAGCAGACGCTGGAGGTGGCATTGGAGAGAATACGTAACCTTCATGGAACGAA  
TGAAGAAAGAGTAATAatggcactactgtgctgataagttctattaatgctggtggtttata  
>GmACS7b (originally GmACS1c) ORF plus 50 nt  
ATGGGTATCAAGATTGAGCAAGAGCAACCTTGTGTTGAGCTTTCAAGAGTTGCGGTTTCTGAAACTCATGGTGAAGA  
CTCCCCCTATTTTGTGGGTGGAAAGCCTATGACGAGAACCCTTATGATGAATTAACAACTCCTCCGGAGTTATAC  
AAATGGGATTGGCAGAAAATCAAGTTTCATTTGATTTGCTGGAAAAGTACTTGGAGGAACACTCAGAGGCCCAACA  
TGGGAAAAGGAGCTCCTGGTTTCAGAGAGAACGCTTTGTTCCAAGACTACCATGGACTTAAATCATTGAGAACAGC  
AATGGCAAGCTTCATGGAACAAATAAGAGGAGGGAGAGCGAAATTTGACCCAGATAGAGTGGTCTCACAGCAGGCG  
CAACTGCAGCCAATGAACTCTTAACCTTCATTCTTGCAAACCCAGGAGATGCTCTACTTGTCCAACGCCTTACTAT  
CCAGGATTTGATAGAGATTTAAGGTGGAGAACTGGGGTGAACATAGTTCCAATCCATTGTGACAGCTCAAACAACCT  
CCAAATCACTCTTCAAGCTTTGGAGGCTGCATATAAAGAAGCAGAAGCAAAGAACAAGAGTAAGAGGAGTGTGA  
TCACAAACCATCAAACCCCTTAGGTGCAACAATTCACCGTTCGGTTCTGGAGGAGCTTCTTGACTTCGTGACTCGC  
AAGAACATCCACCTTGTCTCAGATGAAATCTACTCAGGCTCAGTGTTCCTCCTCCGAGTTCGTGAGTGTAGCAGA  
AATCCTCGAAGCTCGCCAATACAAGAACGCAGAAAGGGTTCACATTGTTTATAGCCTCTCCAAGGACCTTGGTCTTC  
CTGGTTTCAGAGTTGGAACATTTTATTCATACAATGATAAGGTTGTGACCACAGCGAGAAGGATGTCAAGTTTCACC  
TTAATATCCTCTCAGACACAGCACCTTTTGGCGTCTATGTTGTCTGATAAGAAGTTCACAGAGAACTACATTGAGAC  
CAACAGGCAGAGGCTGAAGAAGAGGTACCAAATGATCATTGAAGGGTTGAGAAGGGTTGGCATAGAGTGTGAAAG  
GGAATGCAGGGTTGTTTTGCTGGATGAATCTGAGTCCACTGTTGGAGAAGCCAAGTGGGAAGGAGAATTGGAGCTT  
TGGAATGCTATTTTGCATGAAGTGAACCTCAATATCTCTCCGGGGTCTTCTTGTTCATTGTTCTGAACCGGGTTGTT  
CAGGGTGTGTTTTGCAAATATGAGTGAGCAGACGCTGGGAGTGGCACTGGAGAGACTACGTAACCTTCATGGAACGAA  
TGAAGAAAGACTAATggtgctgtcatcataagttctatgaatggtggtttttataatagtac  
>GmACS7c (originally GmACS1p) ORF plus 50 nt  
ATGGAGCAACCTTGTGTGGAGCTTTCAAAAGTTGCAGTTTCTGAAACTCATGGGGAAGATTCTCCTTATTTTGTGG  
GTGGAAAAGCCTATGATGAGAACCCTATGATGAATTAACCAATCCCTCAGGAGTTATACAAATGGGGTTGGCAGAAA  
ATCAAGTTTTCATTTGATTTGCTTGAAAAGTACTTGGAAAGAGCATTGAGAGGCTTCCACATGGGGAAAAGGAGCTCCT  
GGGTTTCAGAGAGAATGCTTTGTTTCAAGACTATCATGGGCTTAAAACCTTCAGAACAGCAATGGCAAGCTTCATGGA  
ACAAGTGAGAGGTGGGAGAGCAAAATTTGACCCTCAAAGACTTGTCTCCTCACTGCAGGTGCAACTGCAGCCAACGAAC  
TCTTAACCTTCATCCTCGCTAACCCAGGAGATGCTTTACTCGTTCACACCCCTTACTATCCTGGATTTGATAGAGAT  
TTAAGGTGGAGAACTGGGGTAAACATAGTTCCCATCCACTGTGACAGCTCAAACAACCTTCCAGATTACTCCCGAAGC  
CTTAGAGGCCGCATACAAAGACGCAGAAGCCATGAACTCCAAAGTGAGGGGAGTTCTAATCACAAACCCCTTCAAACC  
CATTAGGTGTAACAATTCCACGTTTCGGTTCCTTGAGGAGATTCTTGACTTCGTGACTCGCAAGAATCCATCTGGTC  
TCAGACGAAATCTACTCAGGCTCGGTTTTCTCTCCTCCGAGTTCACAAGCGTGGCAGAAATCCTCGAGGCTCGCCA  
ATACAAAAGACGCGGAAAGAGTTCACATTGTTTATAGCCTGTCCAAAGACCTTGGCCTTCTGGCTTCAGAGTTGGCA  
CCATTTACTCATAACGACAAGGTTGTGACCACAGCGAGGAGAATGTCGAGTTTACCTTAATATCTTCTCAGACA  
CAGCACTTGTGGCTTCTATGTTGTCGGATAAGAAGTTCACCGAGAATATATCAGGACCAACAGGGAGAGGCTGAG  
GAAGAGGTACCAAATGATCATTGAAGGGTTGAGAAGTGCAGGGGATCGAGTGTGAAAGGGGAATGCAGGGTTGTTTT  
GCTGGATGAATCTAAGTCCACTTTTGGGGAATTATAAGGCCAAAGGATCAAGGGAAGTGGTGAATTGGAGCTT  
TGGAATGCTATTTCTGCATGAACTGAAGCTAAATATCTCTCCAGGCTCTTCTTGCCATTGTTCTGAACCAGGTTGGTT  
CAGGGTCTGCTTTGCAAATATGAGTGAGCAAACGCTGGAAATGCAATTGCAAAGAATACGTGACTTCATGGAACGAA  
TAAGGACAGAAAGCGTTTAGTttttttttttttttataatctgtggaagacaaatataaaaaatttaca  
>GmACS7d (originally GmACS1q) ORF plus 50 nt  
ATGGAGCAACCCCTGTGTGGAGCTTTCAAAAGTTGCAGTTTCTGAAACTCACGGGGAAGATTCCCCTTATTTTGTGG  
GTGGAAAAGCCTATGATGAGAACCCTATGCTGAATTAACCAATCCCTCAGGAGTTATTCAAATGGGGTTGGCAGAAA  
ATCAAGTTTTCGTTTGTGATTTGCTTGAAAAGTACTTGGAAAGAGCATTGAGAAGCTTCCACATGGGGAAAAGGAGCTCCT  
GGCTTCAGAGAGAATGCTTTGTTTCAAGACTATCATGGGCTTAAAACCTTCAGAACAGCAATGGCAAGCTTCATGGA  
ACAAGTGAGAGGTGGGAGAGCAAAATTTGACCCTCAAAGAGTAGTACTCACTGCTGGTGCACACTGCAGCCAACGAAC  
TCTTAACCTTCATCCTCGCTAACCCAGGAGATGCTTTACTCGTTCACACCCCTTACTATCCTGGATTTGATAGAGAT  
TTAAGGTGGAGAACTGGGGTAAACATAGTTCCCATCCACTGTGACAGCTCAAACAACCTTCCAGATTACTCCTGAAGC  
CTTAGAGGCAGCATACAAAGATGCAGAAGCCATGAACTCCAAAGTGAGGGGAGTGTAAATCACAAACCCCTTCAAACC  
CATTAGGTGTAACGATTCCACTTTCGGTTCCTTGAGGAGATTCTTGACTTCGTGACTCGCAAGAATCCATCTTGTG  
TCAGACGAAATCTACTCGGGCTCGGTTTTCTCTCCTCCGAGTTCCTCACAAAGCGTGGCAGAAGTCTCGAGGCTCG  
CCAATACAGAAACGCTGAGAGAGTTCACATTGTCTATAGTCTCTCCAAAGACCTTGGCCTTCTGGTTTCAGAGTTG  
GCACCATTTACTCATAACAACGACAAGGTTGTGACCACGGCGAGAAGAATGTCGAGTTTACCTTAATATCTTCTCAG  
ACACAGCACTTGTGGCTTCTATGCTGTGCGATAAGGAGTTCACCGAGAACTACATAAAGACCAACAGAGAGAGGCT  
GAGGAAGAGGAACCAATGATCATTGAAGGGTTGAGAAGTGCAGGGGATTGAGTGTGAAAGGGGAATGCAGGGTTGT  
TTTGTGATGAATCTAAGTCCACTTTTGGAGAAGAATAAGCCAAAGGAAGGGAAGGTGAATTGGAGCTTTGGAAT  
GCTATTCTGCATCAAGTTAAGCTCAATATCTCTCCAGGCTCTTCTTGCCATTGTTCTGAACCAGGTTGGTTCAGGGT

CTGCTTTGCAAACATGAGTGAGCAAACGCTGGAAATTGCATTGCAAAGAATACGTCACCTTCGTGGAACGAATAAGGA  
CACAAAACGTCTTTTTTTGAttttactggacaaaaattattatTTTTtaattcgtgaaaatcaaagagat  
>GmACS9a (originally GmACS1m) ORF plus 50 nt  
ATGAGGCTACTGTCTACAAAAGCCACATGCAACTCTCACGGCCAAGATTCTTCATACTTCCTAGGATGGCAGGAATA  
TGAAAAGAACCCTTACGATGAGGTTCTGAATCCCAAGGGAATTATTCAAATGGGTCTTGACAGAGAATCAGCTCTCTT  
TCGATCTCCTAGAGTCATGGCTCGAAAAAACCCCTGACGTGGCTGGATTCAAAGCGAAGGCAAATCCATATTCCGT  
GAGCTTGCTCTCTTCCAGGACTACCATGGCCTCCCTTCTTAAAGAAGGCATTGGTAGACTTCATGGCAGAGATTAG  
AGGAAACAAAGTCACTTTTGGATCCCAACCACATTGTTCTAACAGCCGGTTCCACGTCAGCAAACGAGACCCTCATGT  
TTTGCCCTCGCTGAAAAAGGAGAGGCCTTCCTCCTTCCCACTCCTTATTACCCAGGATTCGATAGAGATCTCAAGTGG  
CGAACCGGGGTGGAGATTGTTCCAATACAATGCACAAGCTCCAATAACTTCCAAGTCACTGAACCCGCTTTGCAGCA  
AGCTTATCAAGACGCGAAGAAGCGCAACCTCAGAGTCAAAGGCGTGATGGTGACAAAACCCGTCGAACCCACTAGGTA  
CTACAATGTCCCGGAGTGAATTGAACCTACTCATTGACTTCATCAAAGACAAAGACATGCATTTAATAAGCGCAGAG  
ATTTACTCCGGGACCGTTTACAACCTCCCAGGCTTCGTTAGCGTCATGGAAATTCCTAAGGATAGAAATGACCTTAA  
CGTTTTGGGACAAGGTTACGTTGTTTATAGTCTCTCCAAAGACTTGGGTTTACCAGGATTCGCTGTGGGCGCAATCT  
ATTCTGAAAACGACGCCGTTGTGGCGGCTGCGACCAAAAATGTCAAGTTTTGGCTTGGTTTCCTCACAACCCAGTAC  
CTCCTCGCAGCCATGCTTGGTGACAAGAAATTACCAAAAACCTACATCTCTGAGAACCAAAAGAGGTTGAAACGACG  
TCAGAGAAACCTCGTTTCGGGCCTTCAGAAAGCAGGCATTAGCACCCCTAAGACCAACAATGCAGGCTTGTTTTGCT  
GGGTTGACATGAGGCACCTTCTCCATTCCAACACATTCGAAGCTGAGATGGACCTTTGGAAGAAGATACTCTACGAG  
GTTTCGGTTGAACATTTACCAGGCTCGTCCTGCCACTGTACCGAACCTGGCTGGTTCCGAATGTGTTTCGCTAACAT  
GTCCGAGATACTTTAAACATAGCCATGAAACGGTTGAAGACCTTCGTGGAAGCAGAGTCAAATGACAACGGGTGCG  
ACAAGAAAAGAGTTCAGTCTTCAGGAAATTCCTCAAGAAGAAAGTCACTCTCCAATTGGGTTTTCCGGCTATCGTCT  
CGCGACCACCGTGAGCAGGAAGAACGATAGccaggtcgtgacgtgaactgtgaacgcatgcagaattaactttattc  
att

>GmACS9b (originally GmACS1n) ORF plus 50 nt  
ATGAGGCTACTGTCTACAAAAGCCACATGCAACTCTCACGGCCAAGATTCTTCATACTTCCTAGGATGGCAGGAATA  
CGAGAAGAACCCTTTTCGATGAGGTTCTGAATCCCAAGGGAATTATTTCAGATGGGTCTTGACAGAGAATCAGCTCTCTT  
TCGATCTCCTAGAGTCTTGGCTCGCAAAAACCCCTGACGTGCCTGGATTCAAAGCGAAGGCAAATCCATATTCCGT  
GAGCTTGCTCTCTTCCAAGACTACCATGGCCTCCCTTCTTCAAGAAGGCATTGGTAGACTTCATGGCAGAGATTAG  
AGGAAACAGAGTCACTTTTGGATCCCAATCACATTGTTCTAACAGCCGGTTCCACCTCAGCAAACGAGACCCTCATGT  
TTTGCCCTCGCGGAAAAGGAGAGGCCTTCCTCCTTCCCACTCCTTATTACCCAGGATTCGATAGAGATCTCAAGTGG  
CGAACTGGGGTGGAGATCGTTCCAATACAATGCACAAGCTCAAATAACTTCCAAGTCACTGAACCTGCTTTGCAACA  
AGCTTATCAAGACGCCAAGAAGCGCAACCTAAGAGTCAAAGGCGTGCTGGTGACAAAACCCATCGAACCCACTAGGCA  
CTACAATGTCCCGGGGTGAACTGAACCTACTCATTGACTTCATCAAAGACAAAGACATGCATTTAATAAGCGCAGAG  
ATTTACTCCGGGACCGTTTACAACCTCCCAGGCTTCGTTAGCGTCATGGAAATCCTAAGGATAGAAATGACCTTGA  
CATTTGGGACAGAGTTCACGTTGCTATAGTCTCTCCAAAGACTTGGGTTTACCAGGATTCGCTGTGGGCGCCATCT  
ATTCTGAAAACCACGCCGTTGTGGCGGCTGCGACAAAAATGTCAAGCTTCGGTTTGGTTTCCTCGCAAACCCAGTAC  
CTCCTCGCAGCCATGCTCGGTGACAAGAAGTTACCAAAAACCTACATCTCTGAGAACCAAAAGAGGCTGAAACGACG  
TCAGAGAAACCTCGTTTCAGGCCTTCAGAAAGCAGGCATTAGCACCCCTAAGACCAACAATGCAGGCTTGTTTTGCT  
GGGTTGACATGAGACACCTTCTCCATTCCAACACATTCGAAGCTGAGATGGACCTTTGGAAGAAGATACTCTACGAG  
GTTTCGGTTGAACATCTACCAGGCTCGTCCTGCCACTGTACCGAACCTGGCTGGTTCCGAATGTGTTTCGCTAACAT  
GTCCGAGGACACTCTAAACCTAGCCATGAACCGGTTGAAGACCTTCGTGGAAGAGTCCAGCGACAACGGGTGCGCCA  
AGAAAAGAGTTCAGTCTTCGGGAACCTTCTTCAAGAAGAAAGTCACTCTCCAATTGGGTTTTCCGGCTATCGTCTCGC  
GACCACCGTGAGCAAGAAGAACGATAGccaggtcgtgacgtgaactgtgccaagtctgaacgcatgcataattaact

>GmACS9c (originally GmACS1g) ORF plus 50 nt  
ATGAGACTTTTGTCCACAAAAGCAACGTGCAATAGTCACGGCCAAGATTCTTCATACTTTTTAGGATGGCAGGAATA  
CGAGAAAAACCCTTACGACAAGGTCCATAACCCCAAAGGGATTATCCAAATGGGTCTCGCAGAGAATCAGCTCTCAT  
TCGACCTCCTAGAGTCATGGCTCGCCAAGAACCTTGACGTGGCAGGGTTCAAGCGTGACGGCAAACCCATATTCAGA  
GAACTCGCTCTCTTCCAAGACTACCACGGTCTCCCTTCATTCAAAAGGCATTGGTGGATTTTCATGGCCGAAATCAG  
AGGAAACAAAGTCACTTTTCGACCCCAACCACATCGTTCTCACTGCCGGCGCCACCTCCGCAAACGAAACCTTAATGT  
TCTGTCTCGCTGAACAAGGCGAAGCATTCTCCTCCTCCCACTCCTTATTACCCAGGATTCGACAGAGACCTAAAGTGG  
AGAACCGGGGTTGAGATTGTTCCAATACAATGCAACAGTTCCAATAGCTTCCAATCAGGAGGCAGCATTGCGACA  
AGCGTACGAGGATGCGAAGAAGCGCAACCTAAGAGTGAAGGGCGTTTTGGTCACGAACCCGTCGAACCCGTTAGGCA  
CCACGATGTCTCGGAGTGAACCTTCTCGTCGACTTCATCAAAGAGAAAAACGCATGCATTTGATAAGCGAC  
GAGATTTACTCCGGCAGACTTTTGTAGCTCCCCGGGCTTCGTTAGCGTCATGGAAGTTCTCAAAGAACGAAACGACGT  
CGTCACTGACAACGGAGTCTGGAACAGAGTTCACGTCGCTATAGTCTCTCAAAGACTTGGGTTTTGCCGGGGTTCC  
GCGTCGGCGCTATTTACTCCGAAAACGACACCCGTAGTTGCCGCGGCAACGAAGATGTCGAGCTTTGGTCTTGTCTCT  
TCTCAAACGACGATACCTTCTCTCAGCCATGCTGGGGGACAAGAAGTTACCAGAAACTACATCGCTGAGAACAAAA  
GAGGCTTAAACGACAGCAGAGAATGCTCGTATCGGGGCTATTGAAAACCGGTATTTTCATGCCTTGACAGCAATGCGG

GGTTGTTTTGTTGGGTAGACATGAGACAACCTTTTGCATTTCGAACACGTTCAAGGCGGAGATGGAGCTGTGGAAGAAG  
ATAGTGTACCAAGTTGGGCTTAACATTTCCGCCAGGCTCCTCGTGCCATTGCACCGAGCCGGGGTGGTTCCGCGTGTG  
TTTCGCGAACATGTCCGAGGAGACTCTGGCCTTAGCCATGAAGCGCTTGAAGAACTTCGTGGCGGCTGATGCTGGTG  
CTCTGTTGAACAACAACAACGGAAGCTTCAAGAGAAAGTCCCTACTAAGTGGGTTTTTCGGTTATCGTCTCGCGAT  
CATCATCGTGAACAGGAAGAACGGTAGcctggtcgctctgtagtttgtgtcactcatgcacaaattcattttgattt  
>GmACS9d (originally GmACS1h) ORF plus 50 nt

ATGAGACTTTTTGTCCACAAAAGCAACGTGCAATAGTCACGGCCAAGATTCTTCATACTTTCTAGGATGGCAGGAATA  
CGAGAAAAACCCTTATGATGAGGTCCATAATCCCAAAGGGATTATCCAAATGGGTCTCGCAGAGAATCAGCTCTCAT  
TCGACCTCCTAGAGTCATGGCTCGCAAAGAACCCTGACGTGGCAGGGTTCAAACGTGACGGCAAATCCATATTCAGA  
GAACTCGCTCTCTTCCAAGACTACCATGGCCTCCCTTCATTCAAAAAGGCATTGGTGGATTTTCATGGCCGAAATCAG  
AGGAAACAAAGTCACTTTTCGACCCCAACCACATCGTTCTCACCGCCGGCGCCACCTCCGCAAACGAAACCTTAATGT  
TCTGTCTCGCCGAACAAGGCGAAGCATTCCCTCCTCCCCACTCCTTATTACCCAGGATTCGACAGAGACCTAAAGTGG  
AGAACCGGGGTTGAGATTGTTCCAATCCAATGCAACAGTTCCAACAACCTTCAAATCACGGAGGCAGCATTGCAACA  
AGCCTACGAGGATGCGATGAAGCTCAACCTAAGAGTGAAGGGCGTTTTGGTTCACGAACCCGTCAAACCCATTAGGCA  
CCACAATGTCTCGGAGTGAACCTTCTGGTGCAGTTTCATCAAAGAGAAAAACGACATTCATTTGATAAGCGAC  
GAGATATACTCCGGCACCGTTTTTAGCTCCCCAGGCTTCGTGAGCGTCATTGAAATTCGAAGGAACGAAACGACGT  
CACTGACGGAGACTGGAATAGAGTTACGTCGTCTATAGTCTCTCAAAGACTTTGGTTTTGCCGGGGTTCCGCGTGC  
GCGCTATTTACTCCGAAAATGACACCGTGGTTGCCGCGGCGACGAAGATGTCGAGCTTTGGTCTTGTTCCTTCGCAA  
ACGCAGTACCTCCTCTCGCCATGCTGGGGGACAAGAAGTTCACCAGAACTACATAGCTGAAAACAAAAAGAGGCT  
TAAACGACAACAGAAAATGCTCGTTTTCGGGGTTATTAAGACCGGTATTCCTTGCCTCGACAGCAATGCGGGGCTGT  
TTTGTGGGTAGACATGAGACAACCTTTGTATTTCGAACACGTTTCGAGGCGGAGATGGAGCTGTGGAAGAAGATAGTG  
TACCAAGTTGGGCTGAACATTTCCGCTGGCTCCTCGTGCCATTGCACCGAGCCAGGGTGGTTCCGCGTGTGTTTCGC  
GAACATGTCGAGGAGACTCTGGCCTTGGCCATGAAACGCTTGAAGAACTTCGTGGCGGCTGAGTCTCAGAGGAATA  
GTGGTAGTAATGGTGGTGTCTGTTCAACAACAATGGAAGCTCCAAGAGAAAGTCACTCACCAAGTGGGTTTTTCGG  
TTATCGTCTCGCGATCATCGTCTGTAACAAGAAGAACGGTAGcctggtcgtagtcctttacgtcgctcatgcacaaa  
ttcataaaattcaa

>GmACS9e (originally GmACS1r) ORF plus 50 nt

ATGAACATGCTGTCTAGGAAGGCTAGTCATGACTCTCATGGCCAAGACTCTTCTTACTTTCTAGGGTGGCAAGAGTA  
CGAGAAGAATCTTATCACCCCATTCAAAATCCAACCGGAATCATTTCAGATGGGACTTGCAGAGAATCAGCTTTTCAT  
TTGACCTTCTTAAATCATGGCTTCGAAGAAATTTCTGACATAGTGGGGATGAAGAAAAGATGGAGTATCCGTCTTTAGA  
GAGCTTGCTCTATTTCAAGATTACCACGGGTTACCTGCTTTAAAAAATGAACTGGTGGACTTTATGGCAAAAAATAAG  
AGGAAATGGTGTGAAATTTGCTTCAGAGAAGCTGGTTCACAGCCGGCGCAACTCCCGCCAATGAGATTCTGATGT  
TTTGCCTTGCTGATCCTGGGGAGGCTTTCATTCTTCCACACCCTATTATCCTGGGTTTGATAGAGATCTAAAAATGG  
AGAATGGGGTTGAGATTGTTCCAATGCATTGCTCCAGCTCAAATGGCTTTAGAATCACTTCCTCTGCTTTAGAACA  
AGCCTATCAACAAGCACAAAACTGAATCTCAAATCAAAGGGGTCTTAGTAACCTAACCCCTCAAACCCACTGGGCA  
TAACCATGACCAAACTGAGCTCAACCACCTAGTAGATTTTCGCTATTGACAAGAACATTCACATAATAAGCGACGAA  
ATCTACTCGGGTACGGTCTTCGACTCACCCAAATTCGTAAGCATCACAGAAGTTGTGAACGAGAGAATTACTAGTGT  
CAGCAACAATAACATTTGGAACCGCATTACATAGTTTATAGTCTCTCCAAAGACCTTGGCATAACCAGGATTTCTGTG  
TGGGAATGATTTACTCCAACAACGAAACGGTTGTAACCTGCTGCCACCAAAATGTCAAGCTTCGGATTGGTGTCTCA  
CAAACCTCAGTATTTGGTGGCAAACTTGCTTAAGGACAAGAAATTCACTTGCAAGTACATGGAAGAGACTCAAAAAGAG  
ACTGAAGAGGCGCAAGGAGAAGCTTGTGTCTGGCCTGAGAAACGCTGGGATTAGGTGTTTGAAAGCAATGCTGGGT  
TGTTCTGTTGGGTTGACCTGAGACACTTGTAGGCTCTGCCACTTTTGAGGCAGAGAAGGAGCTTTGGATGAAGATT  
CTTTGCAAAGTTGGTTTAAACATATCTCCTGGCTCTTCTTGCCACTGCTGTGAACCCGGGTGGTTCAGGGTATGCTT  
TGCCAACATGTCTCAAGACACGTTAGAAGTTGCAATGCGACGCATGAAGGCTTTTGCAACTCAACCATCTCTACTA  
GTGTCTTAAGAGGATCCATTGCTAAGTGGGAAAACATAAtgtggttgaagttgatgtggcctgttttctgtccaactt  
aataataagag

>GmACS9f (originally GmACS1u) ORF plus 50 nt

ATGAACATGCTGTCTAGGAAGGCTAGTCATGACTCTCATGGCCAAGACTCTTCTTACTTTCTAGGGTGGCAAGAGTA  
CGAGAAGAATCCTTACCACCCCATTCAAAATCCAACCGGAATCATTTCAGATGGGACTTGCAGAGAATCAGCTTTTCAT  
TTGACCTTCTTAAATCATGGCTTCGAAGAAATTTCTGACATAGTAGGGATGAAGAAAAGATGGAATATCCGTCTTTAGA  
GAGCTTGCTCTATTTCAAGATTACCATGGGTTACCTGCTTTAAAAAATGAACTGGTGGACTTTATGGCAAAAAATAAG  
AGAAAATGGCATCAAATTTGCTTCGAGAGAAGCTCGTTCTCACTGCCGGCGCAACTCCCGCCAATGAGATTCTGATGT  
TTTGCCTTGCTGATCCTGGGGAAGCTTTCATTCTTCCACACCCTATTACCCTGGGTTTGATAGAGATCTGAAATGG  
AGAACCGGGTTGAGATTGTTCCAATGCATTGCTCCAGCTCAAATGGCTTTAGAATCACTTCCTCTGCTTTAGAACA  
AGCCTACCAACAAGCACAAAACTGAATCTCAAATCAAAGGGTTTTAGTAACCAACCCCTCAAACCCACTGGGCA  
TAACCATGACCAAACTGAGCTCAACCACCTAGTAGATTTTCGCAATTGACAAAAACATTCACATAATAAGCGACGAA  
ATCTACTCGGGTACTGTCTTCGACTCACCCAAATTCGTAAGCATCACAGAAGTTGTGAACGAGAGAATTACTACTGT  
CAACAACAATAGCATTACCAGCATTGGAACCGCATTACATTTGTTTATGGTTTTCTCAAAGACCTTGGCATAACCAG

GATTTCTGTGGGAATGATTTTCTCCAACAACGAAACTGTTGTGGCTGCTGCCACCAAAATGTCAAGCTTCGGATTG  
GTGTCTTCACAACTCAGTATTTGGTGGCAAACCTTGTCTAAGGACAAGAAATTCACCTGCAAGCACATGGAAGAGAC  
TCAGAAGAGACTGAAGAGGCGAAAGGAGATGCTTGTGTCTGGCCTCAGAAACCGGGGATTAGGTGTTTGAAAAGCA  
ATGCTGGGTTGTTCTGTTGGGTTGACATGAGACACTTATTGGGCTCTGCCACTACTTTGAGGCAGAGAAGGAGCTT  
TGGATGAACATTCTTTGCAAAGTTGGGTTGAACATATCTCCTGGCTCTTCTTGCCACTGCTGTGAACCAGGTTGGTT  
CAGGGTATGCTTTGCCAACATGTCTGAAGACACGTTAGAAGTTGCAATGCGGCGCATAAAGGCTTTTGCGGACTCAA  
TTACCATCTCTACTAGTGTCTGTAAGAGGATCCATTGCTAAGTGGGAAAATTAAttaatgtggttgaagttgatgagt  
ctgttttctctccaatttaataatag

>GmACS10a (originally GmACS1f) ORF plus 50 nt

ATGAGAGTGATAGTGCCTCTACAAGGAGTTGTCCAAGGCACAGGGGGTCTTTTCTGGGGTCTGTGCATTCCCTGTGC  
TCTATTCTACTTTCTTCAGCTCTACTTCAAACCAAGACACCTCACCACCCTCCACCTTCCCAAACAACCACAAGG  
ACGATGACTCCACCACCTTCCACCGCTCTCTCTCTTCCAATCACAGGCACTCCACTACCCTGCCTCCGCTTACGTG  
TCTCCTCGTGCCAATTCATAACCGCTGCTAACTCCCCTTACTTCTTAGGCTTGACAAGCTTGACAGATGATCCCTA  
TCACGAGACTCATAATCCTGATGGTGTATTTCAGCTTTCTTGCATCAAAGCACCCCTGTCTCTCGACTTGATTCAAG  
ATTGGATTACCACAACGGAAGCACTGCTGTGTTCCGGACACCCTCGGCATTTCTAGGATTGTTCCCTTACCAACCT  
CTCCATGGATTGATGGAGCTCAAAGTGGCTGTGGCTGGTTTCATGTCTCAAGTTTTGGAAAACCTGATTTTCTTCAA  
CACCTCGAGAATGGTACTAACTGCAGGTGCCACTTCTGCCATCGAGATTCTAAGCTTCTGTCTAGCAGATCATGGAA  
ACGCATTCCCTTGTTCACGCTCTTAGCCCTGGCTTTGACGGGGTGTAAAATGGCGCACTGGCGTGGAGATAGTA  
CCTGTTCCCTGCCGAGCACTGATGACTTCAATTTAAGTATAACTTCAATCGAGAGAACCCTTCAATCAAGCAAAGAT  
GCGTGGTCAAAAAGTTCGCGGAATTATAATAACAACCCCTCAAATCCTGCTGGCAAACCTATTGGATAGGGAAACAC  
TGTTGGATCTTTTGGACTTTGCTAGAGAGAAGAATTCACATAATCTCTAATGAAATGTTTGCCAGCTCTTCTTAT  
GGAAACGAAGAGTTTGTGAGCATGGCAGAAATCATGGAGGCAGAAGATCATGACCGGGACAGAGTTCATGTAGTGTT  
TGGTTTGTCAAATGAGCTCTCGGTTCCAGGTTTAAAGGTGGGTGTTATCTACTCTTATAATGACAATGTCTGTGGCTG  
CTTCTAGCAAATTTGGCAAGGTTCTCCACTGTTTCTGCCCCAACCCAAAGATTGCTCATCTCCATGCTCTCAGATACA  
AGTTTTGTGCAAAATTTTATTGAGGTTAACAGATTGAGGCTGCGGAAAATGTATAATACATTTGTTGACAGGGCTGAA  
GCAGTTGGGGATTGAGTGCCTAGGAGCAGTGGTGGTTTTTGTCTGCTGGGCTGACATGAGCAGGTTGATTCCGCTCTT  
ACAGTGAAGGGGGAGCTTGAGCTCTGGGATAGATTGTTGAATGTTGCTAAGATCAATGTTACCCCGGGATCATCA  
TGCTACTGCATTGAACCTGGATGGTTTCGTTTTTGTGTTTGTCTACATCCACTGAAAAGGCTGTTTCTGTAGTAATGGA  
GCGGCTTCGGAGAATTGTTGAGGCCACAAATGGACATAGTTGAtgtggggtcaattagttctgcaaatttagttggt  
ttattgattttttatt

>GmACS10b (originally GmACS1o) ORF plus 50 nt

ATGAGAGTGATAGTGCCTCTGCAAGGCCTGGTCCAAGGCACAGGGGGTCTTTTCTGGGGTCTGTGCATTCCCTGTGC  
TCTCTTGTACTTTCTTCAGCTCTACTTGAGAACCAAGCCATGCCACCACCCTCAGCCTCCACCTTCCCAACAAGGACC  
AGGACCAGGATTCACCAGCTTCCACCGCTCCCTCTCTTCCAACCACAGGCACTCCACTTCCCTCCGCCTCTGCTTAC  
GTGTCCCTCGTGCCAATTCCTCACTGCTGCTAACTCTCCTTATTATCTAGGCTTGACACAAGGTTGCCGTTGATCC  
CTATCACCAACTCATAATCCTCACGGCGTTATTTCAGCTTGCTTTGCACCAAAAACACCCTATCTCTTGACTTGATTC  
AAGATTGGATTACCTCAACGGCAGCGCTGCTGTGTTGGGGACACCCTCGGCATTTCTAGGATTGTTCCCTTACCAA  
CCTCTCCATGGATTGATGGACCTCAAAGTGGCTGTGGCTGGTTTCATGTATCAAGTTTTGGAAAACCTTATTTTCTT  
CAACACCTCCCGAATGGTACTAACTGCAGGTGCCACTTCTGCCATTGAGATTCTAAGCTTCTGTCTAGCAGATAATG  
GAAACGCATTCCCTTGTTCACGCTCTTAGCCCTGGCTTTGACGGGGTGTAAAATGGCGCACTGGCGTGGAGATA  
GTACCTGTTCCCTGCCGAGCACTGATGACTTCAATTTAAGTATAACTTCACTTGAGAGAACCCTTCAAGCAAGCAAA  
GATGCGTGGTCAAAAAGTTTCGTGGAATTATAATAACAATCCCTCAAATCCTGCTGGCAAATGTTTGTAGGGAAA  
CACTGTTGGATCTTTTGGACTTTGCTAGAGAGAAGAATTCACATAATCTCTAATGAAATGTTTGTGGCTCTTCT  
TATGGAAACGAAGAGTTTGTGAGCATGGCAGAAATCATGGAGGCAGAAGATCATGACCGGGACAGAGTTCATATAGT  
GTTTGGTTTGTGCAATGAGCTCTCTGTTCCAGGTTTGAAGGTGGGTGTTATCTACTCTTATAATGACAATGTCTGTG  
CTGCTTCTAGCAAATTTGGCAAGGTTCTCCACTGTTTCTGCCCCAACCCAAAGATTGCTCATCTCCATGCTTTCAGAT  
ACAAGTTTTGTGCAAAAATTTATTGAGGTTAACAGGTTGAGGCTGCGGAAAATGTATAATACATTTGTTGCGGGGCT  
GAAGCAGTTGGGGATTGAGTGCCTAGGAGCAGTGGTGGTTTTTGTCTGCTGGGCTGACATGAGCAGGTTGATTGGCT  
CTTACAGTGAAGGGGAGAGCTTGAGCTCTGGGATAGATTGTTGAATGTTGCTAAGATCAATGTTACCCCGGGTTC  
TCTTGTCACTGTATTGAACCTGGATGGTTTCGTTTTTGTCTTGTCTACATCCACTGAAAAGGATGTTTCTGTAGTAAT  
GGAACGATTTCGGAGAATGTTGATGCCACAAATGGACATGGTTGAtgtggggtggggtcaattagttatgcaaattt  
agttggtttattgattctt

>GmACS12a (originally GmACS1s) ORF plus 50 nt

ATGAAACTCATCTCCCCCTCCAGGGCGTGGTGCAGGGCCGCGGAGGGCTTCTCCTCGGGACCCTCGTCCCCCTGCAC  
GCTCTTCTACTTCTCCAGCTCTACCTCAAACGACGCGGTCCAACCTTCTCCCCCTCCCTCCCCCTCTTCTTCCGAAT  
CCACCCTCCCCCGCACCTCCTCCCGCTCCAATTTGTGACGCGTGGCTCCATTTCCCGCGTCCGCGTCTCCAAGCTC  
GCCACGTCGATTTCAAACCCGACGAGTCACTCTATTACGTAGGTTGGAGAGGGTCTCGCGAGATCCCTACGATGC  
ATTGGAGAATCCCAATGGGATTATTTCAGTTGGGCTTGTGCGATAACAAGCTGTGCTTGATTGATAGGGGAATGGG

TGGCGCGGAACTTGAAGGTTCCATCAGTGGTGGTGGTGGTGGTGGGAAATCAATGGGATTGTGCCGTATCAGTCGTTT  
GATGGGGTGATGGAATTGAAAATGGCTTTGTGAGATTTTATGCATCAGGTGATGGGTGGATCCGTGAAATTTGACCC  
ATCTAACATGGTACTAACAGCTGGGGCAACTCCTGCTATTGAGATATTGTCTTCTGTTTGGCAGACCATGGAAATG  
CATTCTTGTCCCTACACCATATTATCCAGGCTTTGACAGAGATGTAAGGTGGCGTCTGGGGTAGACCTAATACCT  
GTTCACTGTGCGAGTACTGACAATTTGATTTAAATATCACTGCTCTTGAACAAGCATTAGTCAAGCAAGAAAACG  
AGGAGTCAAAGTTCGTGGAATTTCTAATTTCCAACCCTTCAAATCCTGTTGGCAATATGATGACACAAGACATGCTTT  
ACAGTCTTCTAGACTTTGCTGAAGAGAAAAATATTCATATCATTGCTGATGAAGTATTTGCAGGCTCCACATATGGA  
AGTGAGAAGTTTGTGAGCGTAGCTGAAATTTGATTGAGATTATATAGACAAGAGCCGGGTTTCATATAATATATGG  
TCTATCAAAAGACCTCTCGCTTGTGGCTTTAGAGTGGGGTTATATGTTCAATGAGAGTGTGGTGGCAGCTG  
CCAAGAAGTTGAGTAGATTTTCTCTATATCTGCTCCAACCAGAGGTTAGTTACTTCAATGCTTTTCAGATAAAAAGA  
TTTATTCAGGAGTACTTTGAAACCAACCGGAAAAGAATACGACAAATGCATGATGAATTTGTGGGTTGTTTAAAGTAA  
ACTAGGAATCAAGTGTGCCAAGAGCAGTGGTATGTACTGTTGGGTTGATATGAGTGGATTAATCCGACCTTATA  
GTGAGAAAAGGAGAAATTGAATTATGGGAGAAGTTTTTGTAGTGTGGCAAGATCAATATAACTCCTGGGTCAGCCTGT  
CATTGCATAGAACCAGGATGGTTTCGGATTTGTTTTTACCCTATAACATTAGAGGAGATCCCTATGGTTATTGATCG  
AATTAGGAGAGTTGTTGAAAGTTGTAATTTTTCTAGTTGAagttccattgtttcattgacatttacagatgcctgat  
gttcagtcagaa

>GmACS12b (originally GmACS1t) ORF plus 50 nt

ATGAAACTCATCGTCCCCCTCCAGGGCGTGGTTCAGGGACGCGGAGGCCTTCTCCTCGGGACTCTCGTCCCCCTGCGC  
GCTCTTCTACTTCCCTCCAGCTCTACCTCAAACGACGCCGTTCCAACCTTCTCCCCCTCCCGAACCCACCC  
TCCCACGCACCTCCTCCCCTCCAGTTTGTGCGACACGTGGCTCCATTTCCCGTGTCCGGGTCTCCAAGCTCGCCACG  
CAGATTTCCAGACCCGACGAGTCGCTCTATTACGTCCGGTGGAGAGGGTTTTCGCGAGATCCCTACGACGCGTTGGA  
GAATCCCAATGGGATTATTCAGTTGGGCTTGTGCGATAACAAGCTGTGCTTGGATTTGATAGGGGAATGGGTGGCAC  
GGAACCTTGAAGGGTCCATCAGTGGCGGTGTTGGTCTGGGAATCAATGGGATTGTGCCGTATCAGACGTTTGTATGGG  
GTCATGGAATTGAAAATGGCTTTGTCAGATTTTATGCATCAGGTGATTGGGGGATCAGTGAATTTGACCCATCTAA  
CATGGTACTAACAGCTGGGGCAACTCCTGCAATTGAGATATTGTCTTCTGTTTGGCAGACCATGGAAATGCATTCC  
TTGTCCCTACACCATATTATCCTGGCTTTGACAGAGATGTAAGATGGCGTCTGGGGTAGACCTAATACCTGTTTCAT  
TGTCGCGAGTACTGACAATTTGATTTAAATATCACTGCTCTTGAACAAGCATTAGTCAAGCAAGAAAACGAGGAGT  
CAAAGTTCGTGGAATTTCTAATTTCCAACCCTTCAAATCCTGTTGGCAATATGATGACACAAGACATGCTTTACAGTC  
TTTTAGACTTTGCTGAAGAGAAAAATATTCATATCATTGCTGATGAAGTATTTGCAGGCTCCACGTATGGAAGTGAG  
AAGTTTGTGAGCATAGCTGAAATTTCTTAATTCAGATTATATAGACAAGAGCCGGTCCATATAATATATGGTCTGTC  
AAAAGACCTTTGCTTGTGGCTTTAGAGTCCGGGTTATATGTTCAATGAGAGTGTGGTGGCTGCTGCCAAGA  
AGTTGAGTAGATTTTCTCTATATCCGCTCCGACCCAGAGGTTAGTTACTTCAATGCTTTTCAGATAAAAAGATTTATT  
CGGGAGTACTTTGAAACCAACCAGAAAAGAATACGACAAGTGCACGATGAATTTGTGGGTTGTTTAAAGTAAACTAGG  
AATCAAGTGTGCCAAGAGCAGTGTGGTATGTACTGTTGGGCTGATATGAGTGGATTAATCCGACCTTATAGTGAGA  
AAGGAGAAATTGAATTATGGGAGAAGTTTTTGTAGTGTGGCTAAGATCAATATAACTCCTGGGTCAGCCTGCCATTGC  
ATAGAACCAGGATGGTTTAGGATTTGTTTTTACCCTATAACATTAGAGGAGATCCCTTTGGTAATTGAACGAGTTAG  
GAAAGTTGTTGAAAGTTGTGATTTCTTAGTTGAagttctattgtttcattgacatttacagttaaggcctgatggt  
gcagcca



**Table S2 (supplement).** Soybean ACC synthases (GmACS) and elongation factor 1b (*GmEF1b*) primers used for semi-quantitative real-time PCR.

| Gene Name | Primer Name | Primer Sequence                    |
|-----------|-------------|------------------------------------|
| GmACS6b   | GmACS1a_f1  | CTTCAAACAAGGAGATCATGGTGC           |
|           | GmACS1a_r1  | TCATCATATATCAGTTACTTCTTCTAGAGGGTT  |
| GmACS7a   | GmACS1b_f1  | GAACGAATGAAGAAAGAGTAATAATGGCACTA   |
|           | GmACS1b_r1  | TATAACAACAACAGCATTAAATAGAACTTATCAC |
| GmACS7b   | GmACS1c_f1  | GAACGAATGAAGAAAGACTAATGGTGCTGTC    |
|           | GmACS1c_r1  | GTACTATTATAAAAACAACAACATTCATAGAAC  |
| GmACS6a   | GmACS1d_f1  | CTTCAAACAAGGAGGTCATGGTTC           |
|           | GmACS1d_r1  | CATCGTATATCAGTTACTTCTTCTGAGATGGT   |
| GmACS6c   | GmACS1e_f1  | AATCAGAACACCGAAGCCAAGAAAT          |
|           | GmACS1e_r1  | CAAGCAGTATGTGTTAGAGGACTCA          |
| GmACS9c   | GmACS1g_f1  | GCGGCTGATGCTGGTGCTCTGT             |
|           | GmACS1g_r1  | AAATCAAATGAATTTGTGCATGAGTGACACA    |
| GmACS9d   | GmACS1h_f1  | GCGGCTGAGTCTCAGAGGAATAGT           |
|           | GmACS1h_r1  | TTGAATTTTATGAATTTGTGCATGAGCGACG    |
| GmACS2a   | GmACS1i_f2  | TTAGGCTCAGTTTTTCTTCAAGGATGTTTGAG   |
|           | GmACS1i_r2  | CGTGCAGAACCCTGATTCAATTAATCAAG      |
| GmACS2c   | GmACS1j_f2  | GCTTCTCCAACCTCTAGAAGATTTGATGAGAATG |
|           | GmACS1j_r2  | AATGAAGGTATGCTTGCTGGTCCAAC         |
| GmACS2b   | GmACS1k_f2  | CTTAGGCTCAGTTTCTTCTTCAAGGATATTTGAT |
|           | GmACS1k_r2  | CGCTCGAGTAGAACCCAGATCCAATC         |
| GmACS2d   | GmACS1l_f2  | TTATGTCACCTCACATGATGTCACCCCA       |
|           | GmACS1l_r2  | TAATGAAGGTATGCTTGCTGGTCCAAT        |
| GmACS9a   | GmACS1m_f1  | GAAGCAGAGTCAAATGACAACGGGT          |
|           | GmACS1m_r1  | AATGAATAAAGTTAATTCTGCATGCGTTCACA   |
| GmACS9b   | GmACS1n_f1  | GAAGAGTCCAGCGACAACGGGT             |
|           | GmACS1n_r1  | AGTTAATTATGCATGCGTTCAGACTT         |
| GmACS7c   | GmACS1p_f1  | GAACGAATAAGGACAGAAAGCGTTT          |
|           | GmACS1p_r1  | TGTAAATTTTTTATATTTGTCTTCCACAGATTA  |
| GmACS7d   | GmACS1q_f1  | GAACGAATAAGGACACAAAACGTCTTTTTTTTGA |
|           | GmACS1q_r1  | ATCTCTTTGATTTTTCACGAATTAATAATAATA  |
| GmACS9e   | GmACS1r_f1  | GACTCAACCATCTCTACTAGTGTCTTAAGAGGA  |
|           | GmACS1r_r1  | CTCTTATTATTAAGTTGGACAGAAAACAGGCCA  |
| GmACS9f   | GmACS1u_f1  | GACTCAATTACCATCTCTACTAGTGTGCGTAAGA |
|           | GmACS1u_r1  | CTATTATTAATTGGAGAGAAAACAGACTCATC   |
| GmEF1b    | GmEF1b-f    | GAAGACAAAAGGCAGCAGAGGAA            |
|           | GmEF1b-r    | TCCACAGATAACAAGGTCATCGACA          |
